# Supplementary material for: Structural heterogeneity in polymeric nitric oxide donor nanoblended coatings for controlled release behaviors
Source: Royal Society of Chemistry journal article supplement (doi:10.1039/c8ra07707j), 2018-01-01
Supplement: c8ra07707j1.pdf [file c8ra07707j1.pdf]

Supporting Information

## **Structural Heterogeneity in Polymeric Nitric Oxide Donor Nanoblended Coatings for Controlled Release Behaviors**

Hyejoong Jeong<sup>a</sup>, Kyungtae Park<sup>a</sup>, Jae-Chan Yoo<sup>b</sup> and Jinkee Hong<sup>a,\*</sup>

---

<sup>a</sup> Department of Chemical and Biomolecular Engineering, Yonsei University, Seoul 03722, Republic of Korea

<sup>b</sup> Biotechnology Research Center, JCBIO Co., LTD & Avison Biomedical Research Center (ABMAC), Yonsei University, Seoul 03722, Republic of Korea

|                     | BPEI <br>(Branched polyethylene imine) | ALG <br>(Alginic acid) |
|---------------------|-------------------------------------------------------------------------------------------------------------------------|-----------------------------------------------------------------------------------------------------------|
| Chemical Structures |                                        |                         |
| MW                  | 25,000                                                                                                                  | 75,000 <sup>a</sup>                                                                                       |
| pKa                 | 8.5 <sup>b</sup>                                                                                                        | 3.4 <sup>c</sup>                                                                                          |
| pH                  | 9                                                                                                                       | 8 or 4                                                                                                    |

**Table S1.** Chemical properties of polyelectrolytes in the table. a. Estimated molecular weight of alginate written in the experiment section, b. pKa value of BPEI[1] c. pKa value of ALG[2,3]

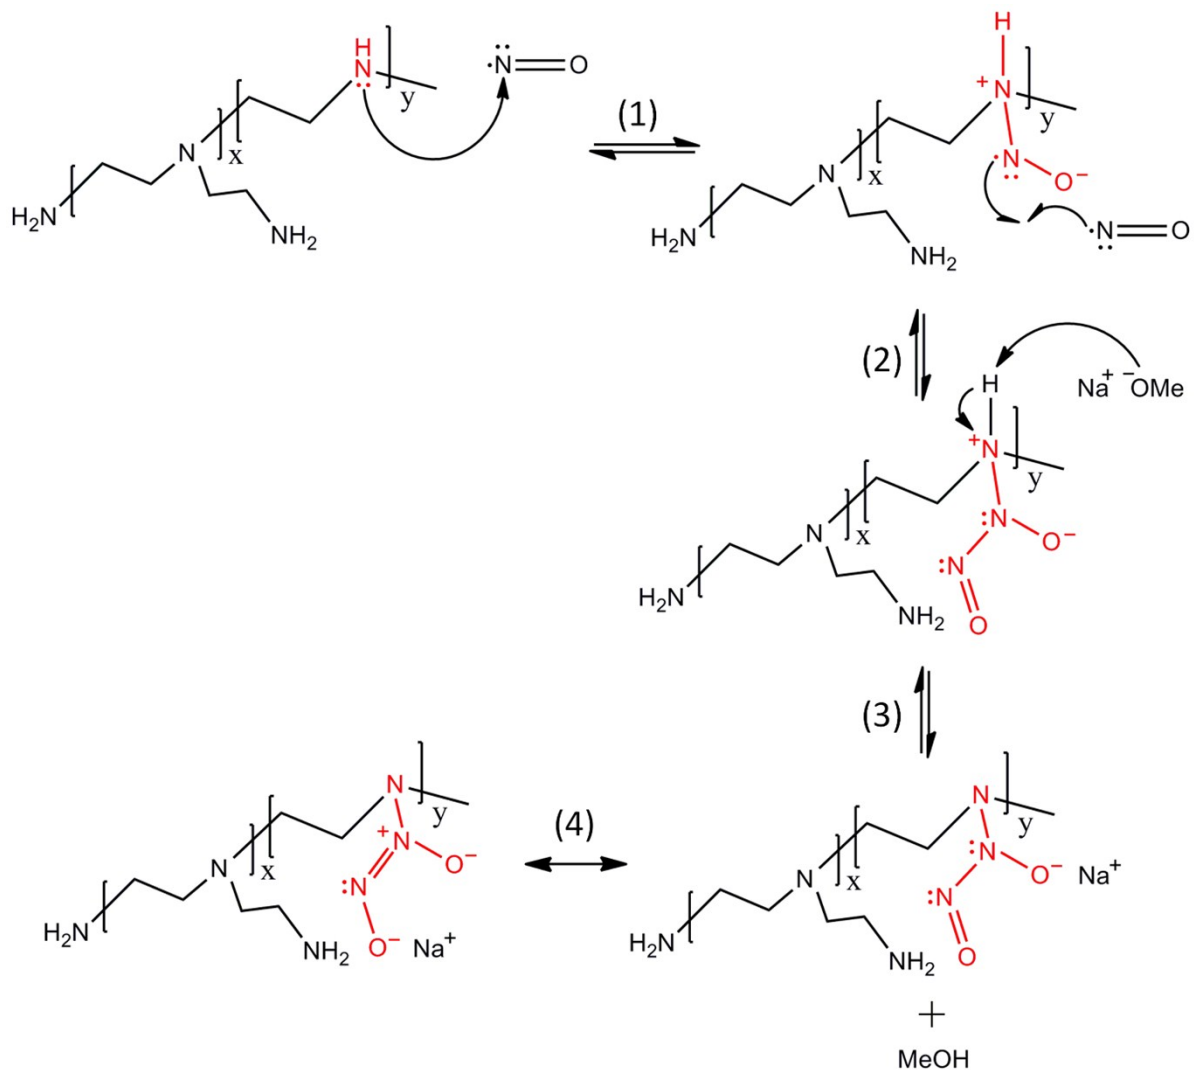

**Figure S1.** Mechanism of *N*-diazeniumdiolate formation on (BPEI/ALG) nanoblended coatings.

(modified from Drago and Schoenfisch et al.[4-7])

Sodium methoxide ( $\text{NaOMe}$ ) which is a strong base catalyst, leading the deprotonation of the amino nitrogen and following dominant *N*-diazeniumdiolate formation due to the shift of equilibrium at third step (3).

*N*-diazeniumdiolate species includes a *N*-diazeniumdiolate anion and an ammonium counteraction, where the ammonium counteraction is from either an adjacent amine on the same structure or a second molecule containing an amine site.

| Number of bilayers (n) | Film1: (BPEI9/ALG8) <sub>n</sub> |                |                                | Film2: (BPEI9/ALG4) <sub>n</sub> |                |                                |
|------------------------|----------------------------------|----------------|--------------------------------|----------------------------------|----------------|--------------------------------|
|                        | Mass (ug·cm <sup>-2</sup> )      | Thickness (cm) | Density (ug·cm <sup>-3</sup> ) | Mass (ug·cm <sup>-2</sup> )      | Thickness (cm) | Density (ug·cm <sup>-3</sup> ) |
| 2.5                    | 0.60                             | -              | -                              | 1.11                             | 1.17.E-06      | 9.57.E+05                      |
| 4.5                    | 0.90                             | 1.33E-06       | 6.76E+05                       | 6.37                             | 6.15.E-06      | 1.04.E+06                      |
| 6.5                    | 2.29                             | 4.22E-06       | 5.42E+05                       | 14.93                            | 1.45.E-05      | 1.03.E+06                      |
| 8.5                    | 4.46                             | 1.19E-05       | 3.76E+05                       | 38.53                            | 6.96.E-05      | 5.54.E+05                      |
| 10.5                   | 8.15                             | 2.70E-05       | 3.02E+05                       | 66.87                            | 1.13.E-04      | 5.94.E+05                      |

**Table S2.** Density of Film 1 and Film2 according to each number of bilayer, calculated by mass and thickness results.

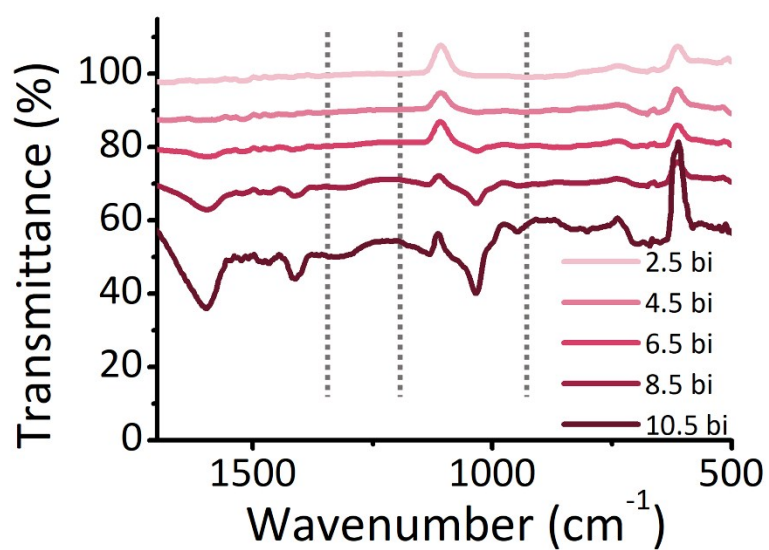

**Figure S2.** FT-IR spectra of Film 1; (BPEI9/ALG8)<sub>n</sub> nanoblended coatings (n=2.5, 4.5, 6.5, 8.5, 10.5) before *N*-diazeniumdiolate generation. The specific parts to be compared with the spectra after generation of *N*-diazeniumdiolate are indicated by gray-dotted lines.

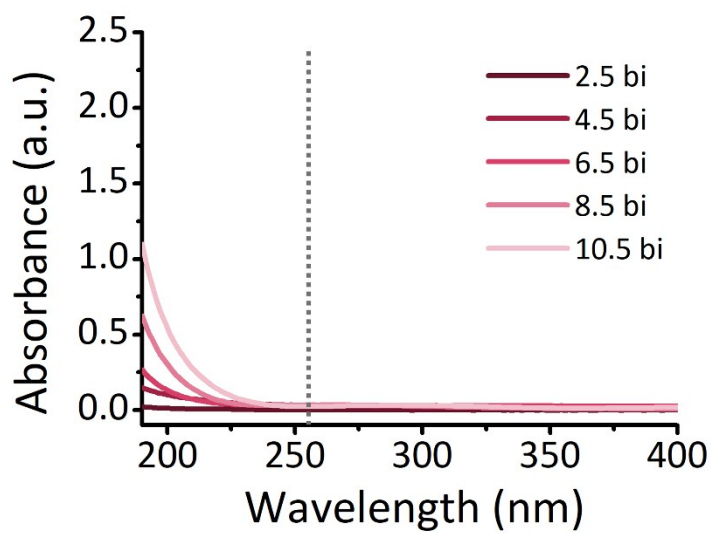

**Figure S3.** UV-vis absorbance of Film1; (BPEI9/ALG8)<sub>n</sub> nanoblended coatings (n=2.5, 4.5, 6.5, 8.5, 10.5) before *N*-diazeniumdiolate generation. 252 nm of wavelength is indicated by gray dotted line.

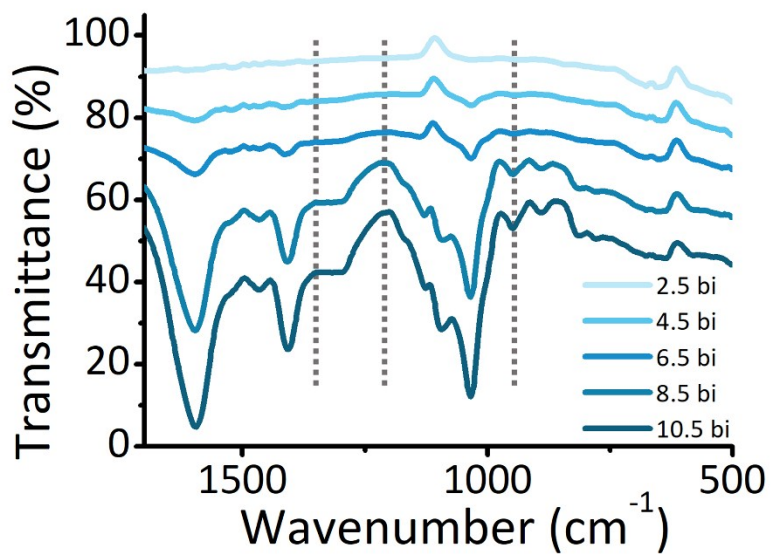

**Figure S4.** FT-IR spectra of Film2; (BPEI9/ALG4)<sub>n</sub> nanoblended coatings (n=2.5, 4.5, 6.5, 8.5, 10.5) before *N*-diazeniumdiolate generation. The specific parts to be compared with the spectra after generation of *N*-diazeniumdiolate are indicated by gray-dotted lines.

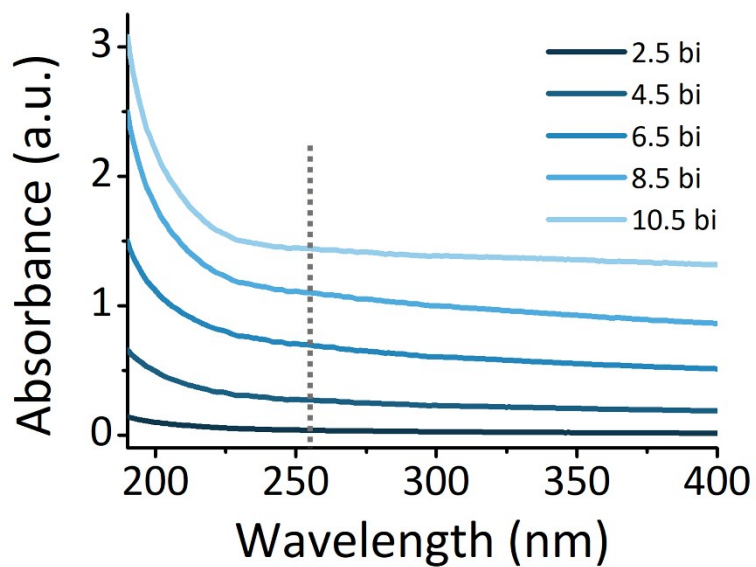

**Figure S5.** UV-vis absorbance of Film2; (BPEI9/ALG4)<sub>n</sub> nanoblended coatings (n=2.5, 4.5, 6.5, 8.5, 10.5) before *N*-diazoniumdiolate generation. 252 nm of wavelength indicated by gray dotted line.



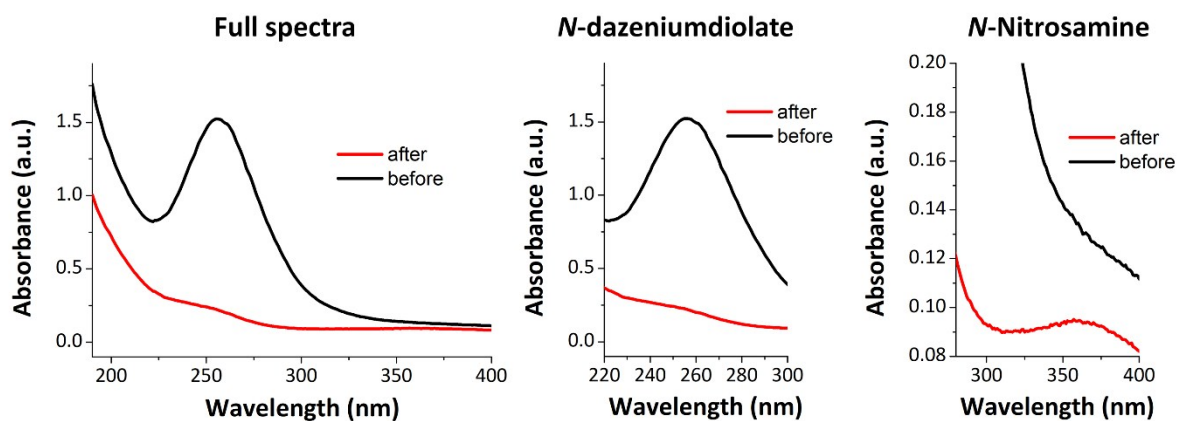

**Figure S6.** UV-vis absorbance of Film 1; (BPEI9/ALG8)<sub>10.5</sub> nanoblended coating after NO release. From the full spectra, the regions of *N*-diazoniumdiolate and *N*-nitrosamine were each magnified as individual graphs. Black spectrum indicates the film before NO release and red spectrum indicates after NO release at 37°C in PBS for 43 hours.

Compared with the absorbance at 252 nm of both spectra, it can be seen that 13.7% of *N*-diazoniumdiolate was remained after NO release. The peak of *N*-nitrosamine was detected at around 350 nm.

## References

- [1] J. M. Silva, S. G. Caridade, R. R. Costa, N. I. M. Alves, T. Groth, C. Picart, R. L. Reis, J. O. F. Mano 2015 *Langmuir* **31** 11318
- [2] S. Choosakoonkriang, B. A. Lobo, G. S. Koe, J. G. Koe, R. Middaugh 2003 *J. Pharm. Sci.* **92** 1710
- [3] K. Y. Lee, D. J. Mooney, 2012 *Prog. Polym. Sci.* **37** 106
- [4] R. S. Drago, R. O. Ragsdale, D. P. Eyman 1961 *J. Am. Chem. Soc.* **83** 4337
- [5] R. S. Drago 1962 *Adv. Chem.* **36** 143
- [6] R. O. Ragsdale, B. R. Karstetter, R. S. Drago 1965 *Inorg. Chem.* **4** 420
- [7] H. Zhang, G. M. Annich, J. Miskulin, K. Stankiewicz, K. Osterholzer, S. I. Merz, R. H. Bartlett, M. E. Meyerhoff 2003 *J. Am. Chem. Soc.* **125** 5015
